# Supplementary material for: Reversible mechanochromism in dipyridylamine-substituted unsymmetrical benzothiadiazoles
Source: Royal Society of Chemistry journal article supplement (doi:10.1039/c4ra09921d), 2014-10-14
Supplement: c4ra09921d1.pdf [file c4ra09921d1.pdf]

**Reversible mechanochromism in dipyridylamine-substituted unsymmetrical  
benzothiadiazoles**

**Prabhat Gautam, Ramesh Maragani, Shaikh M. Mobin and Rajneesh Misra\***

Department of Chemistry,  
Indian Institute of Technology Indore,  
Indore- 452017, India.

rajneeshmisra@iiti.ac.in

**Table of Contents**

|                                                                                                        |            |
|--------------------------------------------------------------------------------------------------------|------------|
| <b>I. Experimental details</b> .....                                                                   | <b>S2</b>  |
| <b>II. Copies of <sup>1</sup>H NMR, <sup>13</sup>C NMR spectra and HRMS of the New Compounds</b> ..... | <b>S5</b>  |
| <b>III. TGA of BTD 2 and 3</b> .....                                                                   | <b>S14</b> |
| <b>IV. UV/vis and Emission Data of BTD 2 and 3</b> .....                                               | <b>S15</b> |
| <b>V. X-ray and PXRD analysis of BTD 3</b> .....                                                       | <b>S20</b> |
| <b>VI. DFT Calculations for 2 and 3</b> .....                                                          | <b>S25</b> |

**I. Experimental Section:** Chemicals were used as received unless otherwise indicated. All oxygen or moisture sensitive reactions were performed under nitrogen/argon atmosphere.  $^1\text{H}$  NMR (400 MHz), and  $^{13}\text{C}$  NMR (100MHz) spectra were recorded on the Bruker Avance (III) 400 MHz instrument by using  $\text{CDCl}_3$ . Chemical shifts for  $^1\text{H}$  NMR spectra are reported in delta ( $\delta$ ) units, expressed in parts per million (ppm) downfield from tetramethylsilane using residual protonated solvent as an internal standard ( $\text{CDCl}_3$ , 7.26 ppm}. Chemical shifts for  $^{13}\text{C}$  NMR spectra are reported in delta ( $\delta$ ) units, expressed in parts per million (ppm) downfield from tetramethylsilane using the solvent as internal standard ( $\text{CDCl}_3$ , 77.0 ppm}. The  $^1\text{H}$  NMR splitting patterns have been described as “s, singlet; d, doublet; t, triplet and m, multiplet”. Thermogravimetric analyses were performed on the Metler Toledo Thermal Analysis system. UV-visible absorption spectra were recorded on a Carry-100 Bio UV-visible Spectrophotometer. Emission spectra were taken in a fluoromax-4p fluorimeter from HoribaYovin (model: FM-100). The excitation and emission slits were 2/2 nm for the emission measurements. All of the measurements were done at 25°C. The density functional theory (DFT) calculation were carried out at the B3LYP/6-31G\*\* level for C, N, S, H in the Gaussian 09 program. HRMS was recorded on Bruker-Daltonics, micrOTOF-Q II mass spectrometer. The XRD measurements were performed using Rigaku SmartLab, Automated Multipurpose Xray diffractometer. The X-rays were produced using a sealed tube and the wavelength of the X-ray was 0.154 nm (Cu K-alpha).

## Reaction Scheme

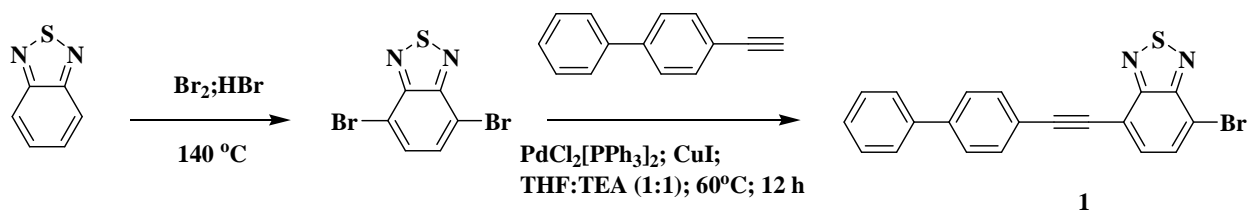

### Preparation of benzothiazole 1.

To a stirred solution of the 4-ethynylbiphenyl (1 mmol), and dibromo-BTD **1** (1 mmol) in THF, and TEA (1:1, v/v) were added [PdCl<sub>2</sub>(PPh<sub>3</sub>)<sub>2</sub>] (10 mg, 0.014 mmol) and CuI (2 mg, 0.01 mmol) under an argon flow at room temperature. The reaction mixture was stirred for 12 h at 60 °C, and then cooled to room temperature. The solvent was then evaporated under reduced pressure, and the mixture was purified by SiO<sub>2</sub> chromatography with DCM/hexane (1:3, v/v), followed by recrystallization in DCM:hexane (1:3) to obtain **1**. Pale yellowish solid ( 203 mg, Yield: 52 %): <sup>1</sup>H NMR (400 MHz, CDCl<sub>3</sub>, δ in ppm): 7.85 (d, 1H, J = 7.5 Hz), 7.75–7.72 (m, 2H), 7.68 (d, 1H, 7.5 Hz), 7.65–7.62 (m, 4H), 7.49–7.44 (m, 2H), 7.40–7.36 (m, 1H); <sup>13</sup>C NMR (100 MHz, CDCl<sub>3</sub>, δ in ppm): 154.1, 153.1, 141.8, 140.1, 132.7, 132.4, 132.0, 128.9, 127.8, 127.1, 127.0, 121.2, 116.7, 114.6, 96.8, 85.2; HRMS (ESI-TOF) *m/z* calcd for C<sub>20</sub>H<sub>11</sub>BrN<sub>2</sub>S + Na: 412.9719 [M + Na]<sup>+</sup>, found 412.9683 [M+ Na]<sup>+</sup>.

### Preparation of benzothiadiazole 2.

To a stirred solution of the 3-ethynylpyridine (1 mmol), **1** (1 mmol) in THF, and TEA (1:1, v/v) were added [PdCl<sub>2</sub>(PPh<sub>3</sub>)<sub>2</sub>] (10 mg, 0.014 mmol) and CuI (2 mg, 0.01 mmol) under an argon flow at room temperature. The reaction mixture was stirred for 24 h at 60 °C, and then cooled to room temperature. The solvent was then evaporated under reduced pressure, and the mixture was purified by SiO<sub>2</sub> chromatography with DCM/hexane (2:2, v/v), to obtain **2**. Yellowish green solid ( 322 mg, Yield: 78 %); <sup>1</sup>H NMR (400 MHz, (CDCl<sub>3</sub>, δ in ppm): 8.91 (s, 1H), 8.63 (m, 1H), 7.98–7.95 (m, 1H), 7.86–7.82 (m, 2H), 7.77–7.74 (m, 2H), 7.67–7.63 (m, 4H), 7.49–7.45 (m, 2H), 7.41–7.34 (m, 2H); <sup>13</sup>C NMR (100 MHz, CDCl<sub>3</sub>, δ in ppm): 154.3, 154.2, 152..5, 149.2, 141.9, 140.1, 138.7, 132.8, 132.4, 132.2, 128.9, 127.8, 127.1, 127.0, 123.1, 121.2, 119.8, 117.9,

116.2, 97.9, 93.6, 88.4, 85.9, HRMS (ESI-TOF)  $m/z$  calcd for  $C_{27}H_{15}N_3S + H$ : 414.1059  $[M + H]^+$ , found 414.1058  $[M + H]^+$ .

### **Preparation of benzothiadiazole 3.**

2,2'-Dipyridylamine (4.0 mmol), **1** (3.0 mmol), anhydrous potassium carbonate (12.0 mmol), cupric sulfate (0.63 mmol), and 1,2-dichlorobenzene (10 mL) were added to a round bottom flask, degassed, and flushed with  $N_2$ . The reaction mixture was heated at 180 °C for 48 h, and then cooled to room temperature. Dichloromethane and water were added. The organic phase was washed with water and then dried over  $Na_2SO_4$ . After removal of the solvent, the residue was purified by  $SiO_2$  column chromatography, using DCM: Ethylacetate (9 : 1) mixture as eluent to afford **3**. Yellow solid (313 mg, Yield: 65 %);  $^1H$  NMR (400 MHz,  $CDCl_3$ ,  $\delta$  in ppm): 8.30-8.28 (m, 2H), 7.81 (d, 1H,  $J = 7.8$  Hz), 7.75-7.72 (m, 2H), 7.66-7.61 (m, 6H), 7.49-7.45 (m, 2H), 7.41-7.35 (m, 2H), 7.14-7.12 (m, 2H), 7.03-6.99 (m, 2H);  $^{13}C$  NMR (100 MHz,  $CDCl_3$ ,  $\delta$  in ppm): 157.5, 156.1, 151.5, 148.6, 141.4, 140.3, 137.8, 137.6, 133.3, 132.3, 128.9, 127.7, 127.04, 127.0, 125.6, 121.7, 119.1, 117.2, 114.2, 95.5, 86.1; HRMS (ESI-TOF)  $m/z$  calcd for  $C_{30}H_{19}N_5S + H$ : 482.143  $[M + H]^+$ , found 482.143  $[M + H]^+$ .

## II. Copies of $^1\text{H}$ NMR, $^{13}\text{C}$ NMR spectra and HRMS of the New Compounds

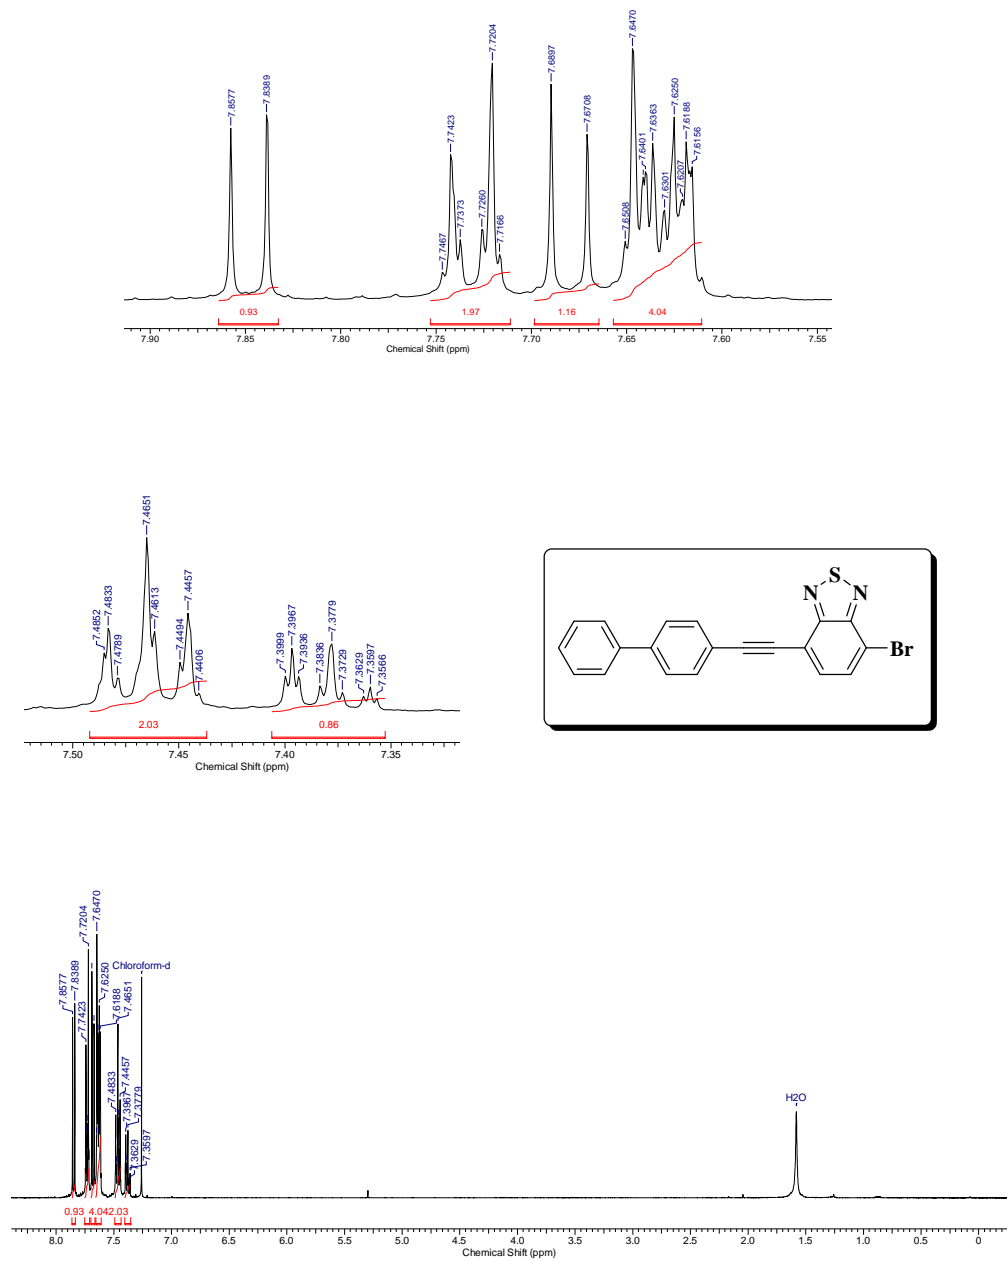

Fig. S1  $^1\text{H}$  NMR Spectra of **1**.

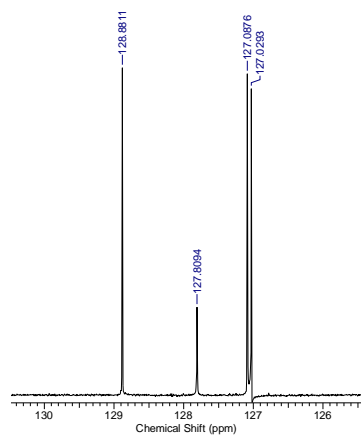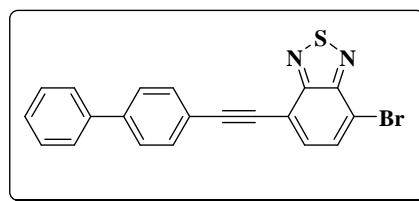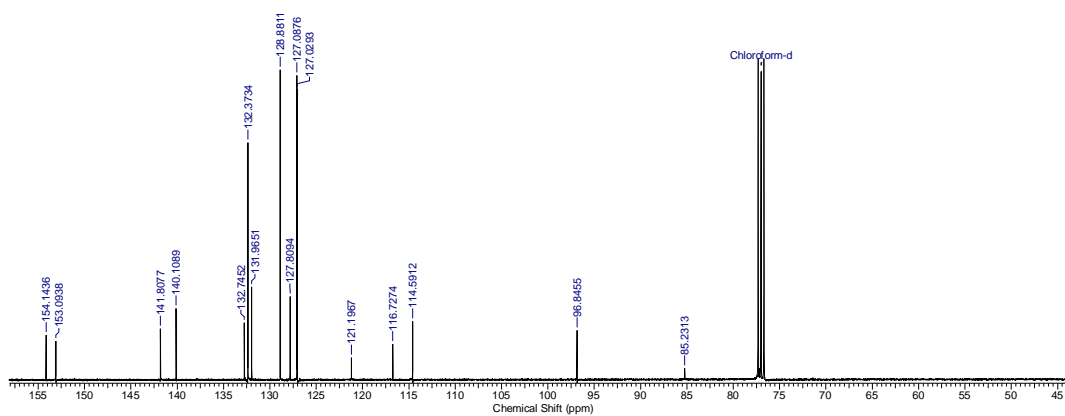

**Fig. S2**  $^{13}\text{C}$  NMR Spectra of **1**.

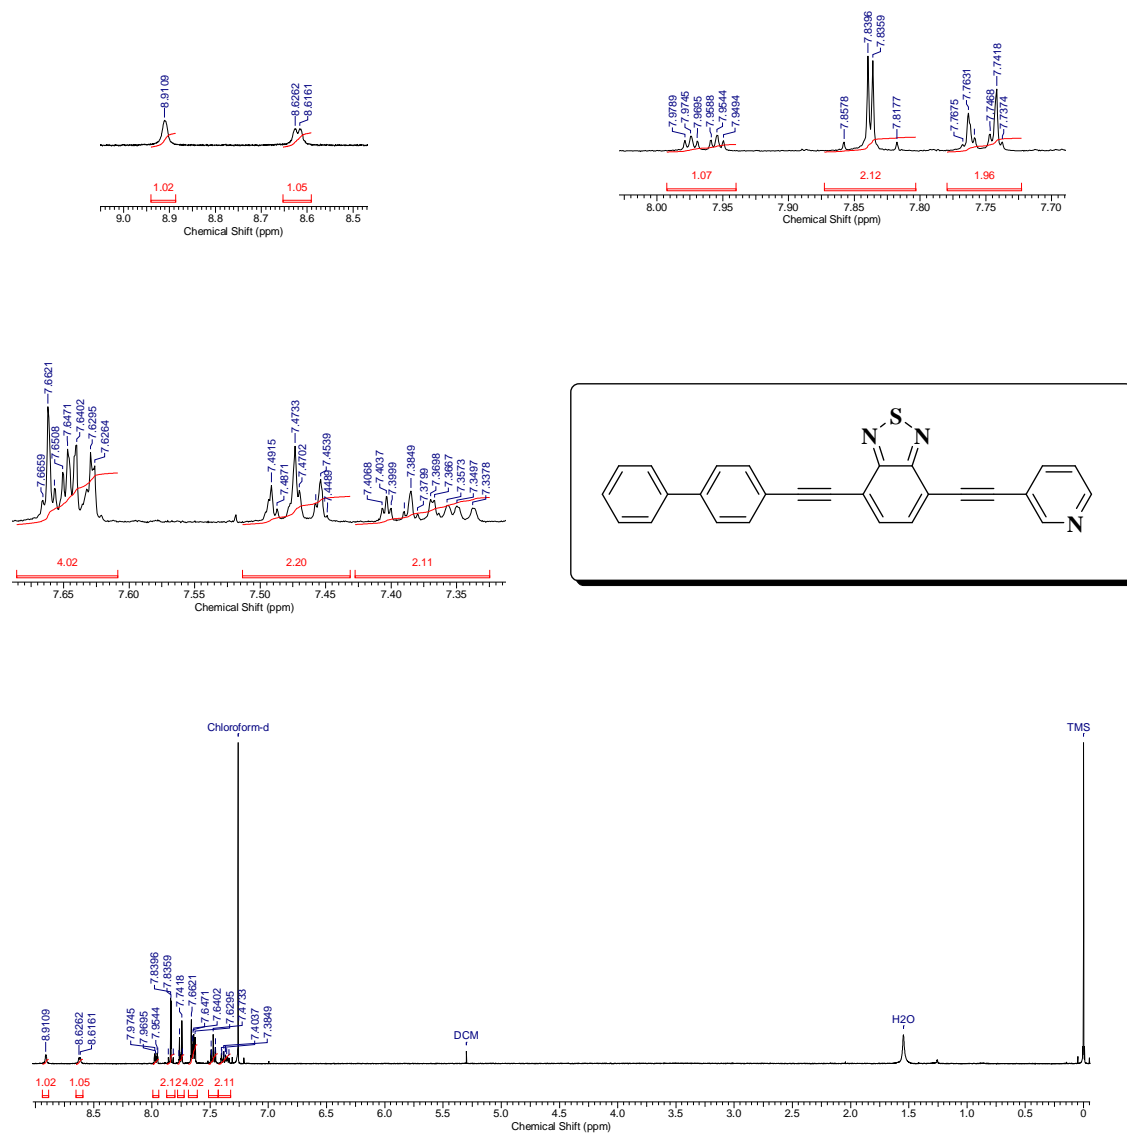

Fig. S3 <sup>1</sup>H NMR Spectra of 2.

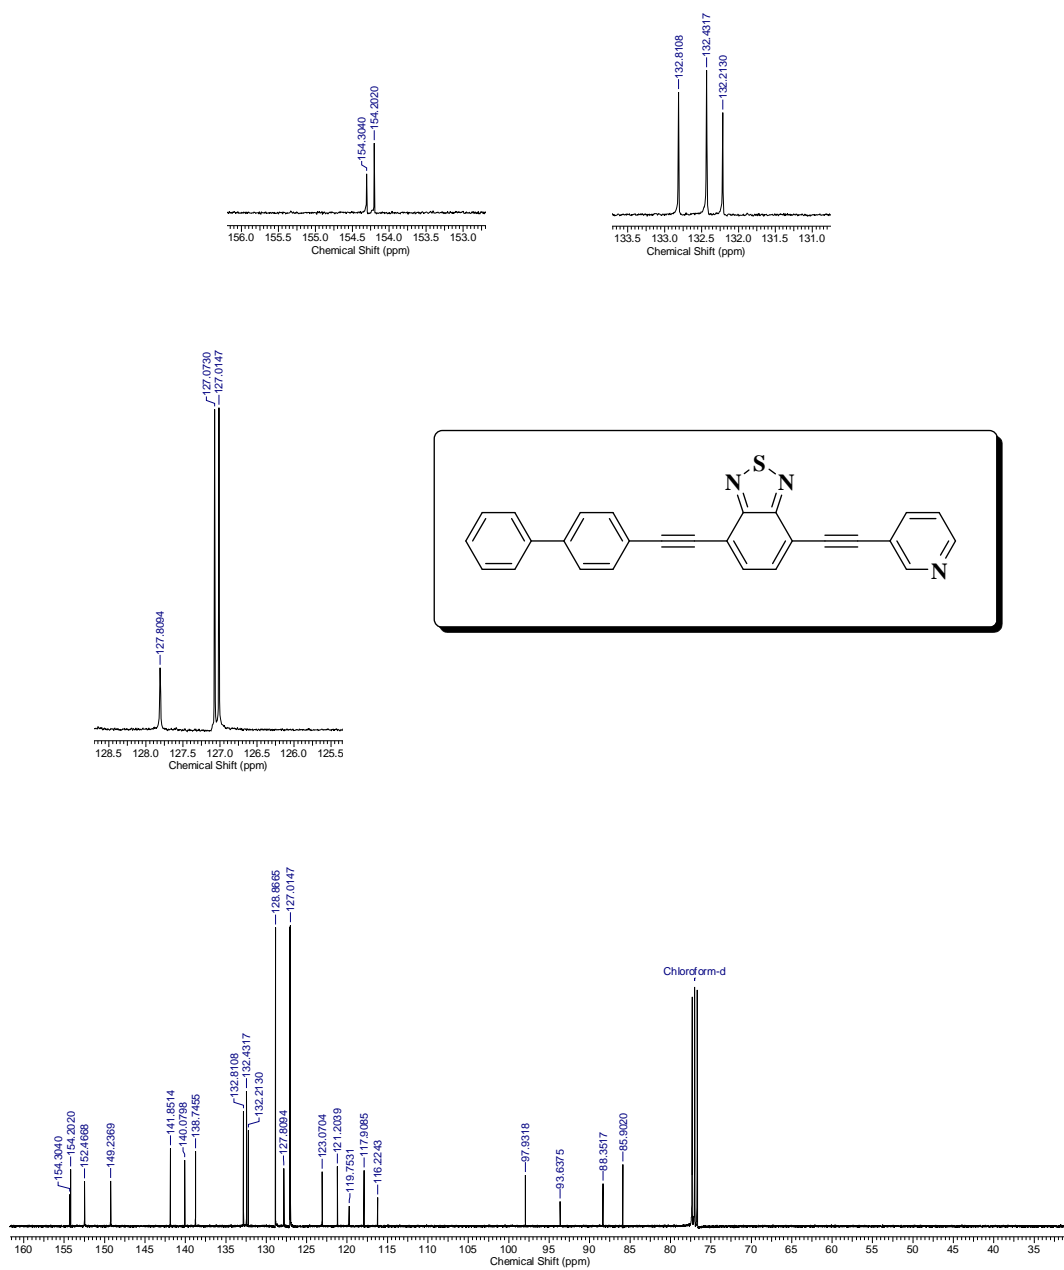

Fig. S4  $^{13}\text{C}$  NMR Spectra of 2.



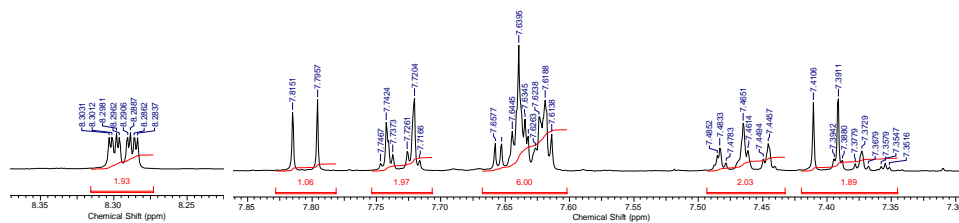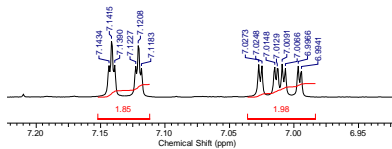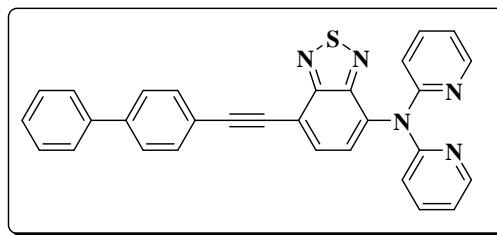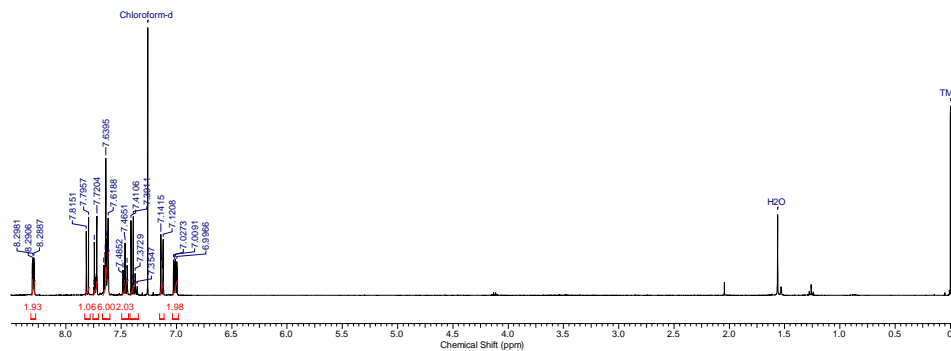

Fig. S5  $^1\text{H}$  NMR Spectra of **3**.

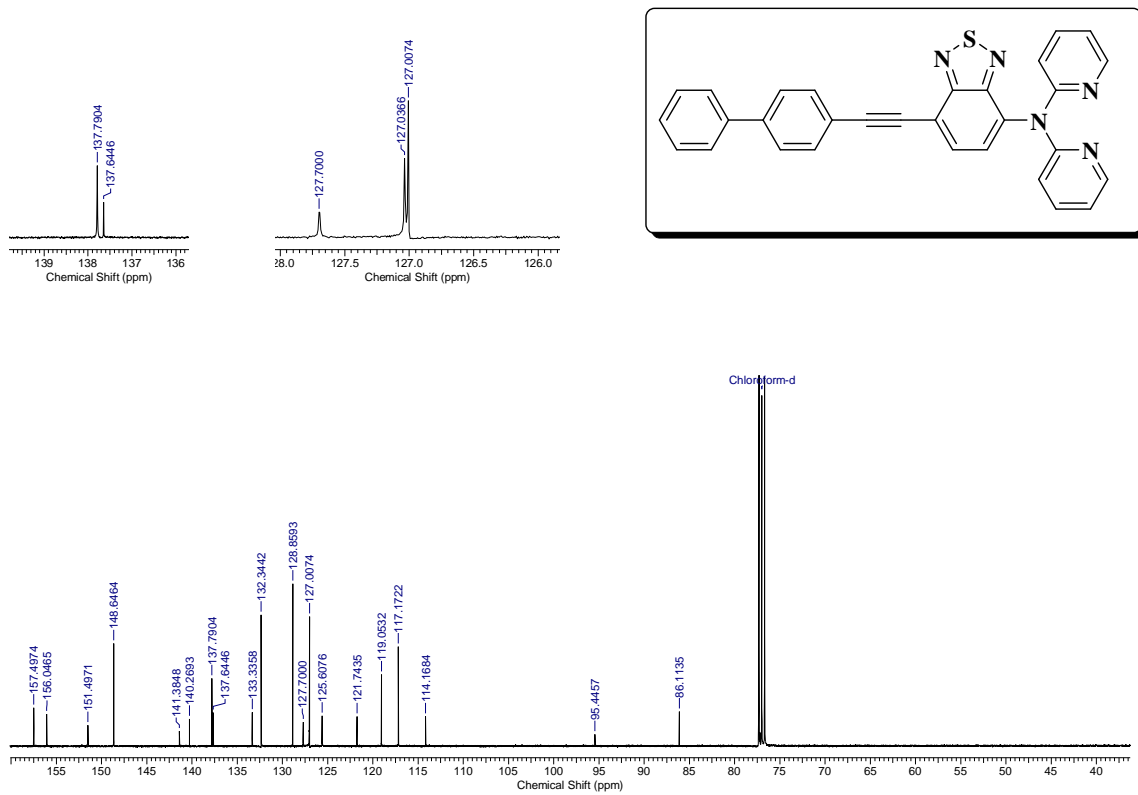

**Fig. S6**  $^{13}\text{C}$  NMR Spectra of **3**.

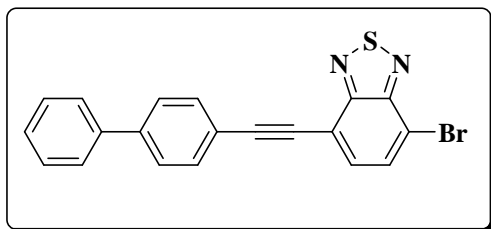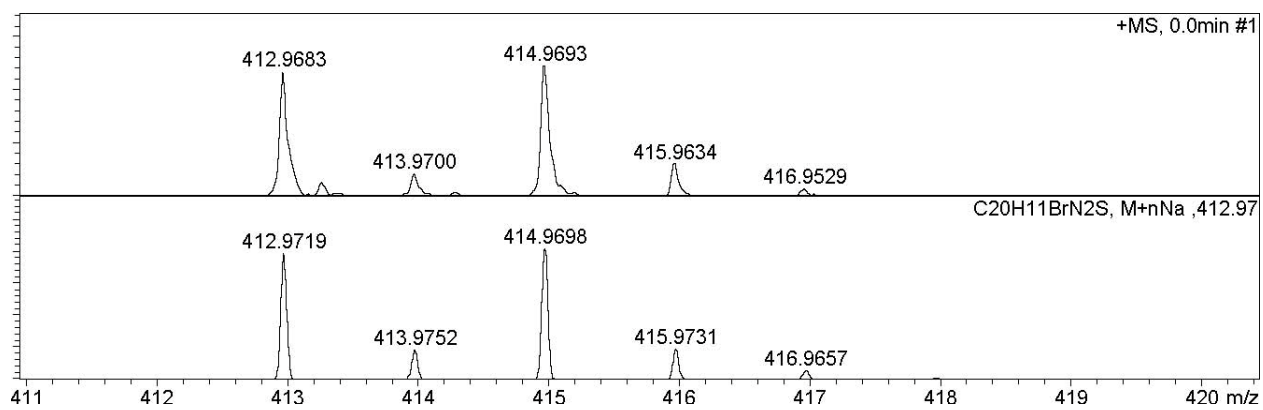

**Fig. S7** HRMS of **1**.

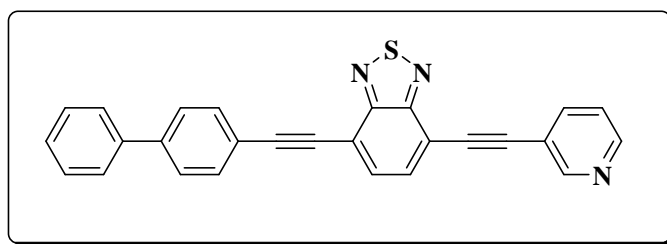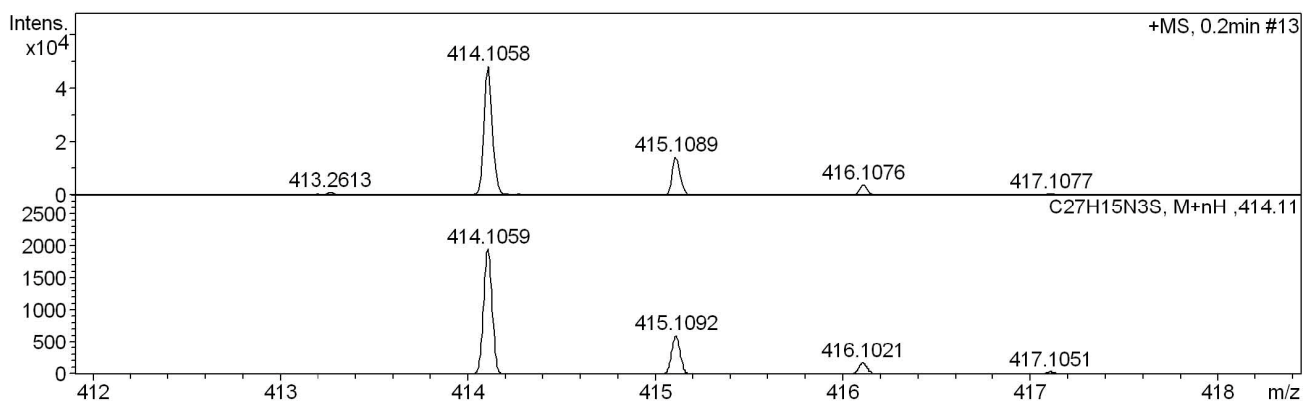

**Fig. S8** HRMS of **2**.

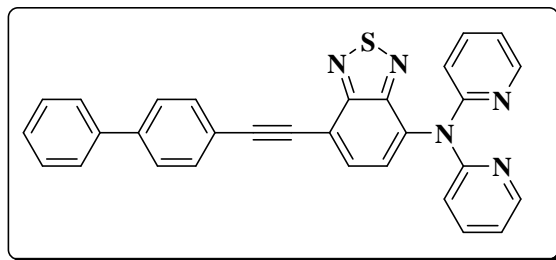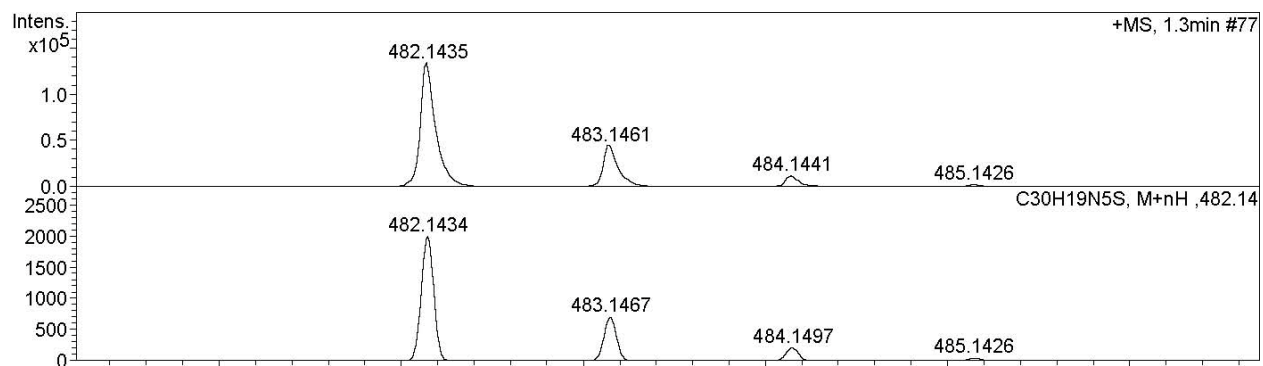

**Fig. S9** HRMS of **3**

### III. TGA of BTD 2 and 3

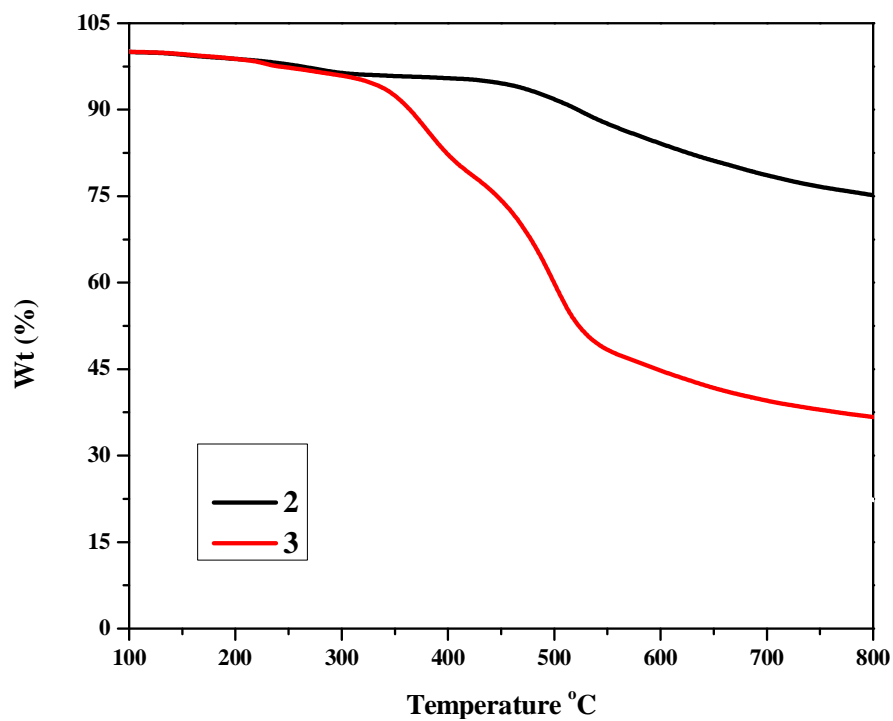

**Fig. S10** TGA plots of **2** and **3** at a heating rate of  $10\text{ }^{\circ}\text{C min}^{-1}$ , under nitrogen atmosphere.

#### IV. UV/vis and Emission Data of BTD 2 and 3

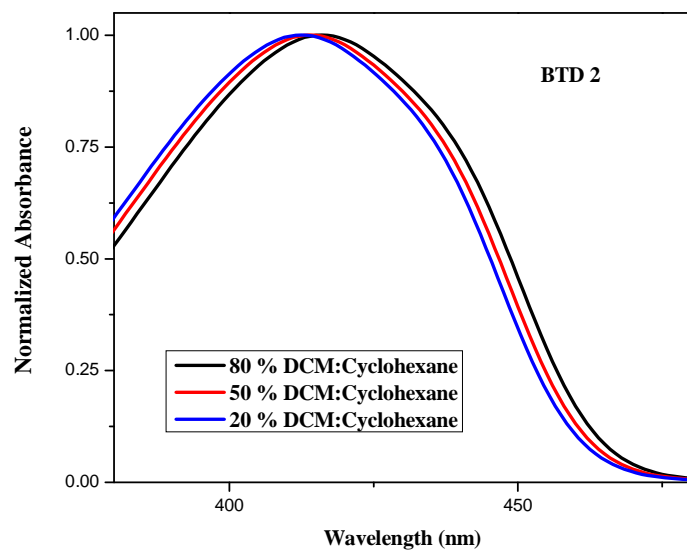

Fig. S11 UV/vis absorption spectra of 2.

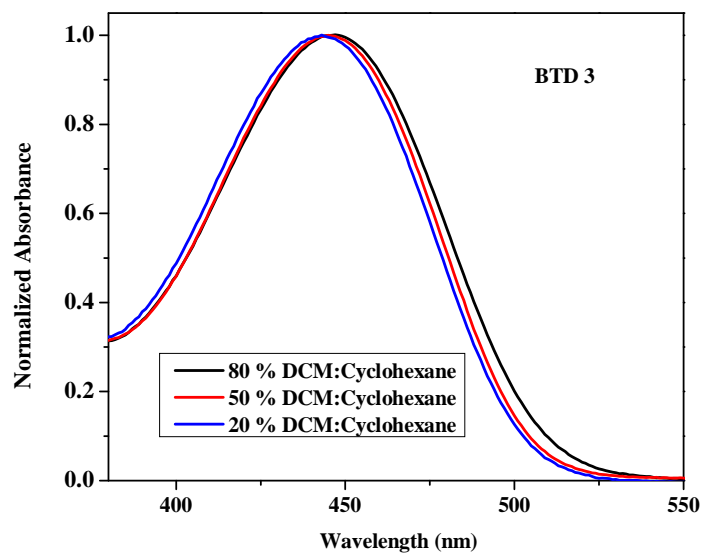

Fig. S12 UV/vis absorption spectra 3.

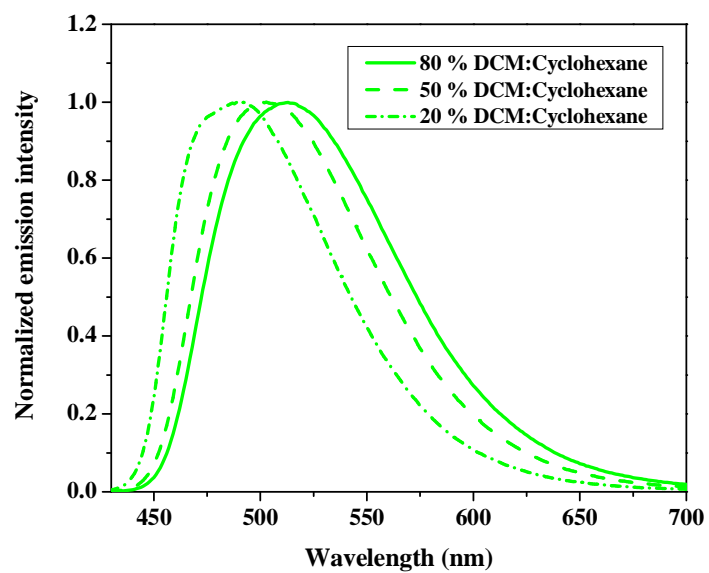

Fig. S13 Emission spectra of 2.

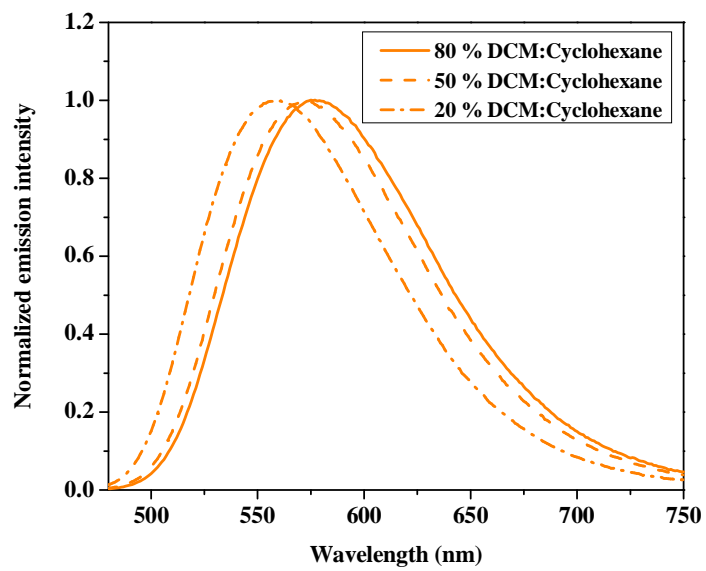

Fig. S14 Emission spectra of 3.



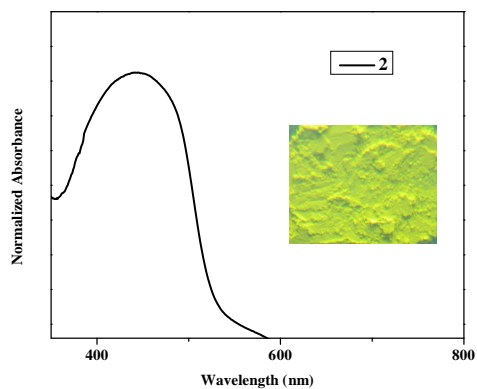

**Fig. S15** Normalized absorbance and photograph of the solid sample of BTD **2** as prepared.

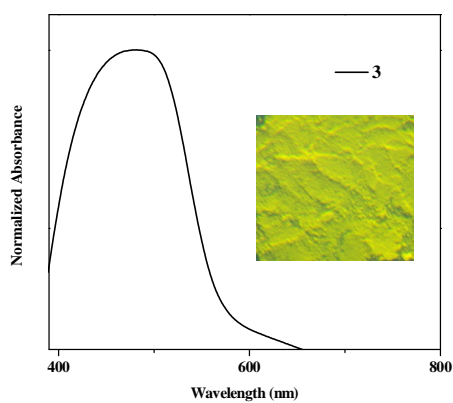

**Fig. S16** Normalized absorbance and photograph of the sample of BTD **3** as prepared.

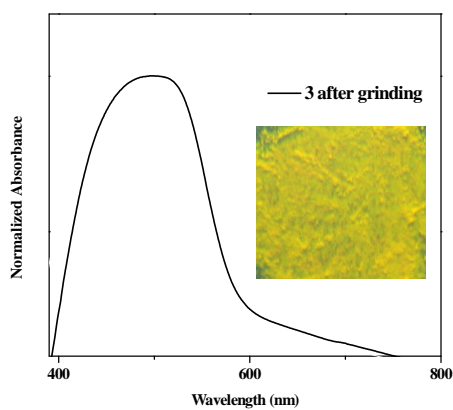

**Fig. S17** Normalized absorbance and photograph of the sample of BTD **3** after grinding.

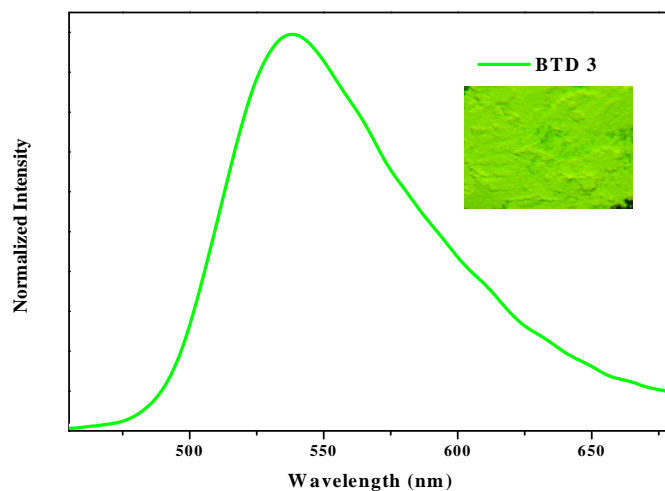

**Fig. S18** Normalized emission and photograph of the solid sample of BTD **2** as prepared.

**Table S1.** Photophysical data of BTD **2** and **3**

| BTD      | Photophysical data <sup>a</sup> |                                        |                                          |                                         |          |                                            |                                        |                                           |     |                               |                                 |
|----------|---------------------------------|----------------------------------------|------------------------------------------|-----------------------------------------|----------|--------------------------------------------|----------------------------------------|-------------------------------------------|-----|-------------------------------|---------------------------------|
|          | $\lambda_{\text{abs}}$ (nm)     | $\epsilon$ ( $M^{-1} \text{cm}^{-1}$ ) | In dichloromethane solution <sup>a</sup> |                                         | $\Phi_F$ | In solid state                             |                                        |                                           |     | Optical Gap (eV) <sup>b</sup> | HOMO-LUMO Gap (eV) <sup>c</sup> |
|          |                                 | $\lambda_{\text{em}}$ (nm)             | Stoke's shift (nm)                       | $\lambda_{\text{abs}}$ (nm) as prepared |          | $\lambda_{\text{abs}}$ (nm) after grinding | $\lambda_{\text{em}}$ (nm) as prepared | $\lambda_{\text{em}}$ (nm) after grinding |     |                               |                                 |
| <b>2</b> | 312                             | 50437                                  | 513                                      | 96                                      | 0.47     | 443                                        | –                                      | 538                                       | 538 | 2.68                          | 2.79                            |
|          | 417                             | 40382                                  |                                          |                                         |          |                                            |                                        |                                           |     |                               |                                 |
| <b>3</b> | 319                             | 90273                                  | 578                                      | 130                                     | 0.14     | 481                                        | 498                                    | 556                                       | 582 | 2.47                          | 2.69                            |
|          | 448                             | 52841                                  |                                          |                                         |          |                                            |                                        |                                           |     |                               |                                 |

<sup>a</sup> measured in DCM; Stoke's shift calculated from the difference of  $\lambda_{\text{max,abs}}$  and  $\lambda_{\text{max,em}}$ .  $\Phi_F$  calculated with Quinine sulfate ( $\Phi = 0.55$ ) in 0.1M  $\text{H}_2\text{SO}_4$  as standard;

<sup>b</sup>Optical gap determined from  $\lambda_{\text{onset}}$ ; <sup>c</sup> HOMO-LUMO gap: calculations performed at the B3LYP/6-31G\*\* level.

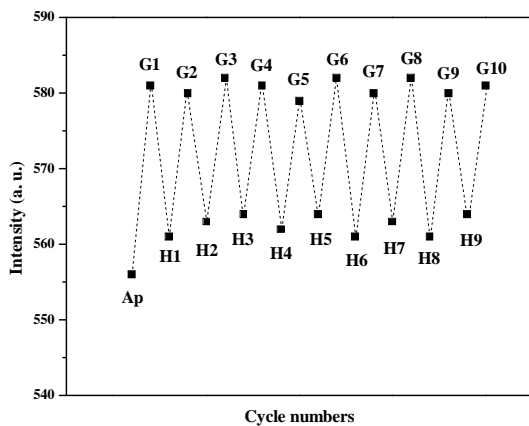

**Fig. S19** BTD **3** as prepared (**Ap**) and repeated switching of the solid-state fluorescence by repeated grinding (**G**) and heating (**H**) cycles.

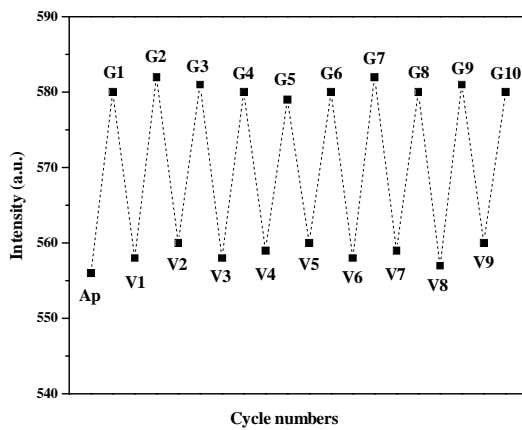

**Fig. S20** BTD **3** as prepared (**Ap**) and repeated switching of the solid-state fluorescence by repeated grinding (**G**) and fuming (**V**) cycles

## I. Crystallographic Data

Single crystal X-ray structural studies of benzothiadiazole **3** was collected at 150(2) K using graphite-monochromated Mo K $\alpha$  radiation ( $\lambda_{\alpha} = 0.71073 \text{ \AA}$ ). The strategy for the Data collection was evaluated by using the CrysAlisPro CCD software. The data were collected by the standard 'phi-omega scan techniques, and were scaled and reduced using CrysAlisPro RED software. The structures were solved by direct methods using SHELXS-97, and refined by full matrix least-squares with SHELXL-97, refining on  $F^2$ . The positions of all the atoms were obtained by direct methods. All non-hydrogen atoms were refined anisotropically. The remaining hydrogen atoms were placed in geometrically constrained positions, and refined with isotropic temperature factors, generally  $1.2U_{eq}$  of their parent atoms. The crystal, and refinement data are summarized in Table 1. The CCDC number **1020099** contains the supplementary crystallographic data for BTD **3**. These data can be obtained free of charge via [www.ccdc.cam.ac.uk](http://www.ccdc.cam.ac.uk) (or from the Cambridge Crystallographic Data Centre, 12 union Road, Cambridge CB21 EZ, UK; Fax: (+44) 1223-336-033; or [deposit@ccdc.cam.ac.uk](mailto:deposit@ccdc.cam.ac.uk)).

**Table S2. Crystal data and structure refinement for BTD 3.**

|                                    |                                                  |
|------------------------------------|--------------------------------------------------|
| <b>BTD</b>                         | 3                                                |
| <b>Identification code</b>         | rm108                                            |
| <b>Empirical formula</b>           | C <sub>30</sub> H <sub>19</sub> N <sub>5</sub> S |
| <b>Formula weight</b>              | 481.56                                           |
| <b>Temperature</b>                 | 273(2) K                                         |
| <b>Wavelength(A)</b>               | 1.5418 A                                         |
| <b>Crystal system, space group</b> | Monoclinic, P 21/c                               |
| <b><i>a</i>/ (Å)</b>               | 20.8735(5)                                       |
| <b><i>b</i>/ (Å)</b>               | 11.8292(3)                                       |
| <b><i>c</i>/ (Å)</b>               | 9.8383(3)                                        |
| <b><math>\alpha</math>/ (°)</b>    | 90                                               |
| <b><math>\beta</math>/ (°)</b>     | 101.978(3)                                       |
| <b><math>\gamma</math>/ (°)</b>    | 90                                               |

|                                                      |                                             |
|------------------------------------------------------|---------------------------------------------|
| <b>Volume</b>                                        | 2376.35(11) Å <sup>3</sup>                  |
| <b>Z, Calculated density (mg m<sup>-3</sup>)</b>     | 4, 1.346                                    |
| <b>Absorption coefficient / (mm<sup>-1</sup>)</b>    | 1.438                                       |
| <b>F(000)</b>                                        | 1000                                        |
| <b>Crystal size</b>                                  | 0.22 x 0.18 x 0.14 mm                       |
| <b>θ range for data collection/(°)</b>               | 4.32 to 71.98                               |
| <b>Limiting indices</b>                              | -25<=h<=24, -14<=k<=10,<br>-12<=l<=11       |
| <b>Reflections collected / unique</b>                | 15657 / 4584 [R(int) = 0.0256]              |
| <b>Completeness to theta</b>                         | θ = 25.00; 99.5 %                           |
| <b>Absorption correction</b>                         | Semi-empirical from equivalents             |
| <b>Max. and min. transmission</b>                    | 0.8240 and 0.7426                           |
| <b>Refinement method</b>                             | Full-matrix least-squares on F <sup>2</sup> |
| <b>Data / restraints / parameters</b>                | 4584 / 0 / 400                              |
| <b>Goodness-of-fit on F<sup>2</sup></b>              | 1.057                                       |
| <b>Final R indices [I&gt;2σ(I)]</b>                  | R1 = 0.0452, wR2 = 0.1274                   |
| <b>R indices (all data)</b>                          | R1 = 0.0529, wR2 = 0.1393                   |
| <b>Largest diff. peak and hole (eÅ<sup>-3</sup>)</b> | 0.312 and -0.397                            |

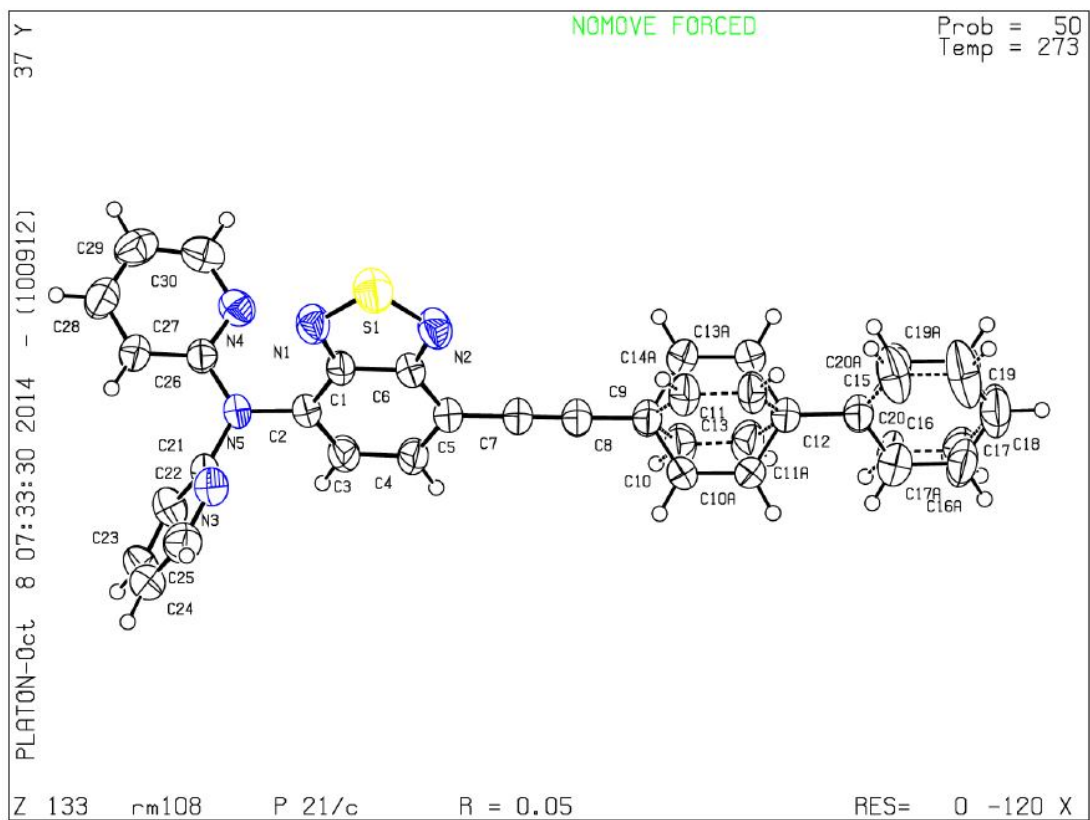

**Fig. 21** ORTEP view of **3** and the atom-labelling scheme. Thermal ellipsoids are plotted at the 50 % level.

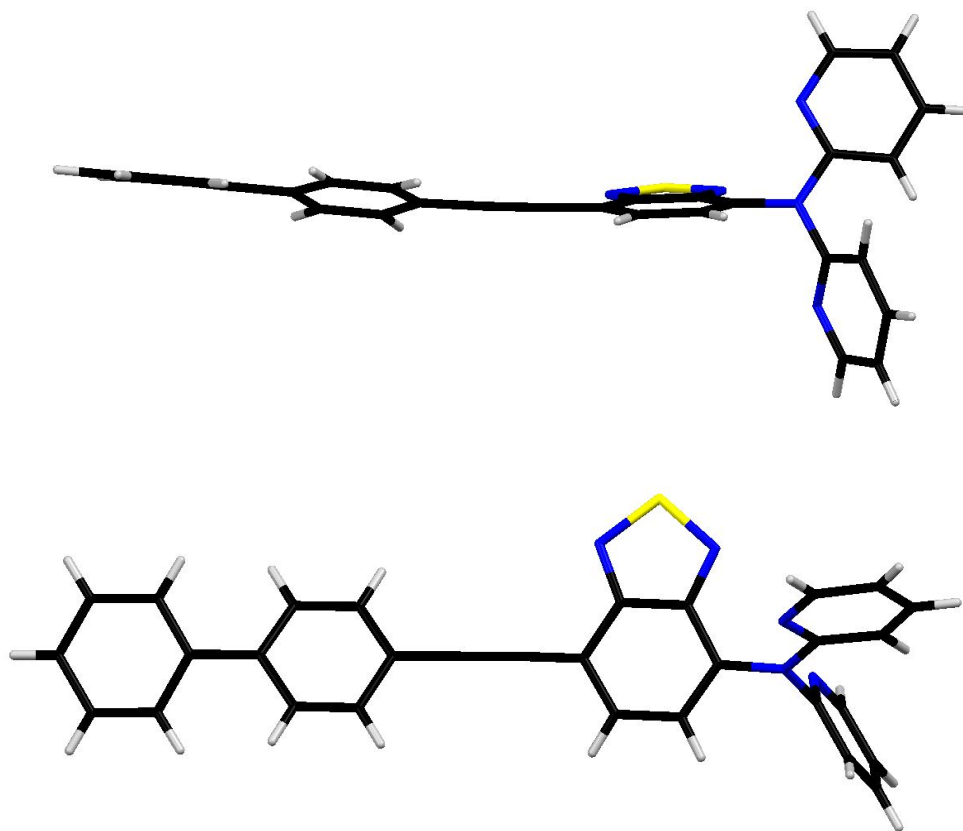

**Fig. S22** Crystal structure of **3** side view (above) and top view (below).

**Table S3.** Selected bond length and bond angle of **BTD 3**

| Bond lengths [Å] |            | Bond angles [°]  |            |
|------------------|------------|------------------|------------|
| <b>For 3</b>     |            |                  |            |
| S(1)-N(2)        | 1.6035(18) | N(2)-S(1)-N(1)   | 101.64(8)  |
| S(1)-N(1)        | 1.6086(17) | C(1)-N(1)-S(1)   | 105.76(12) |
| N(1)-C(1)        | 1.341(2)   | C(6)-N(2)-S(1)   | 106.07(12) |
| N(2)-C(6)        | 1.339(2)   | N(1)-C(1)-C(2)   | 126.49(15) |
| C(2)-N(5)        | 1.416(2)   | N(1)-C(1)-C(6)   | 113.32(15) |
| C(21)-N(5)       | 1.429(2)   | C(3)-C(2)-N(5)   | 121.05(16) |
| C(21)-N(3)       | 1.320(2)   | N(5)-C(2)-C(1)   | 121.69(15) |
| C(25)-N(3)       | 1.347(3)   | N(2)-C(6)-C(5)   | 125.63(15) |
| C(26)-N(4)       | 1.336(2)   | N(2)-C(6)-C(1)   | 113.21(15) |
| C(26)-N(5)       | 1.394(2)   | N(3)-C(21)-C(22) | 123.75(17) |
| N(4)-C(30)       | 1.350(3)   | N(3)-C(21)-N(5)  | 115.47(15) |
|                  |            | C(22)-C(21)-N(5) | 120.77(17) |
|                  |            | N(3)-C(25)-C(24) | 123.5(2)   |
|                  |            | N(3)-C(25)-H(25) | 118.3      |
|                  |            | N(4)-C(26)-C(27) | 123.23(16) |

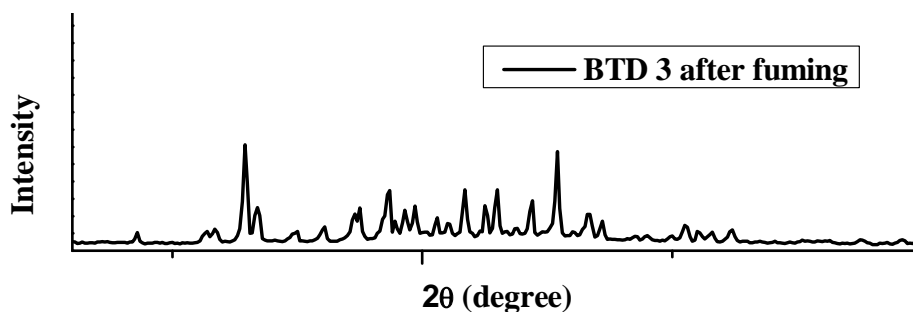**Fig. S23** Powder-XRD patterns of **BTD 3** after fuming with DCM vapor.



# DFT Calculations for 2 and 3. <sup>1</sup>

## BTD 2

Standard orientation:

| Center<br>Number | Atomic<br>Number | Atomic<br>Type | Coordinates (Angstroms) |           |           |
|------------------|------------------|----------------|-------------------------|-----------|-----------|
|                  |                  |                | X                       | Y         | Z         |
| 1                | 16               | 0              | 2.186558                | 3.018415  | -0.198171 |
| 2                | 7                | 0              | 0.906723                | 1.989942  | -0.136800 |
| 3                | 7                | 0              | 3.426868                | 1.942778  | -0.128510 |
| 4                | 6                | 0              | 1.418570                | 0.758746  | -0.059130 |
| 5                | 6                | 0              | 2.868360                | 0.731796  | -0.054262 |
| 6                | 6                | 0              | 3.579870                | -0.518633 | 0.025101  |
| 7                | 6                | 0              | 2.804238                | -1.670056 | 0.094133  |
| 8                | 1                | 0              | 3.306442                | -2.629892 | 0.154940  |
| 9                | 6                | 0              | 1.390007                | -1.644076 | 0.089265  |
| 10               | 1                | 0              | 0.851816                | -2.584296 | 0.146512  |
| 11               | 6                | 0              | 0.658325                | -0.464011 | 0.015181  |
| 12               | 6                | 0              | -0.754436               | -0.444004 | 0.012766  |
| 13               | 6                | 0              | -1.972005               | -0.423371 | 0.011959  |
| 14               | 6                | 0              | -3.391561               | -0.375649 | 0.011462  |
| 15               | 6                | 0              | -4.066580               | 0.860778  | -0.058713 |
| 16               | 6                | 0              | -4.159169               | -1.556195 | 0.082093  |
| 17               | 6                | 0              | -5.454303               | 0.907395  | -0.057184 |
| 18               | 1                | 0              | -3.486390               | 1.775444  | -0.123716 |
| 19               | 6                | 0              | -5.546623               | -1.497354 | 0.083790  |
| 20               | 1                | 0              | -3.653251               | -2.514191 | 0.146347  |
| 21               | 6                | 0              | -6.226201               | -0.267129 | 0.014722  |
| 22               | 1                | 0              | -5.952489               | 1.868516  | -0.139390 |
| 23               | 1                | 0              | -6.116502               | -2.417668 | 0.167514  |
| 24               | 6                | 0              | -7.708329               | -0.209768 | 0.019353  |
| 25               | 6                | 0              | -8.388358               | 0.824073  | 0.686938  |
| 26               | 6                | 0              | -8.472080               | -1.187192 | -0.642431 |
| 27               | 6                | 0              | -9.781119               | 0.878340  | 0.692556  |
| 28               | 1                | 0              | -7.820103               | 1.574510  | 1.228429  |
| 29               | 6                | 0              | -9.864900               | -1.132855 | -0.636623 |
| 30               | 1                | 0              | -7.968561               | -1.979226 | -1.188727 |
| 31               | 6                | 0              | -10.525938              | -0.099903 | 0.030930  |
| 32               | 1                | 0              | -10.285508              | 1.681508  | 1.222327  |
| 33               | 1                | 0              | -10.434632              | -1.893942 | -1.162275 |
| 34               | 1                | 0              | -11.611181              | -0.057583 | 0.035305  |
| 35               | 6                | 0              | 4.993580                | -0.553764 | 0.031770  |
| 36               | 6                | 0              | 6.210318                | -0.583682 | 0.038124  |
| 37               | 6                | 0              | 7.630094                | -0.587743 | 0.043909  |
| 38               | 6                | 0              | 8.351629                | 0.624794  | -0.030181 |
| 39               | 6                | 0              | 8.374133                | -1.779848 | 0.122682  |
| 40               | 7                | 0              | 9.681920                | 0.698329  | -0.029427 |
| 41               | 1                | 0              | 7.806346                | 1.564063  | -0.092189 |
| 42               | 6                | 0              | 9.762192                | -1.706447 | 0.123626  |
| 43               | 1                | 0              | 7.860517                | -2.734174 | 0.181459  |
| 44               | 6                | 0              | 10.368375               | -0.450646 | 0.046334  |

|    |   |   |           |           |          |
|----|---|---|-----------|-----------|----------|
| 45 | 1 | 0 | 10.368373 | -2.604888 | 0.183224 |
| 46 | 1 | 0 | 11.453081 | -0.361763 | 0.045148 |

-----  
Total Energy (HF) = -1600.2309089 Hartree

### BTD 3

Standard orientation:

| Center<br>Number | Atomic<br>Number | Atomic<br>Type | Coordinates (Angstroms) |           |           |
|------------------|------------------|----------------|-------------------------|-----------|-----------|
|                  |                  |                | X                       | Y         | Z         |
| 1                | 16               | 0              | -1.743098               | -2.197647 | 2.184761  |
| 2                | 7                | 0              | -0.461369               | -1.485540 | 1.443324  |
| 3                | 7                | 0              | -2.981151               | -1.449663 | 1.408020  |
| 4                | 6                | 0              | -0.970461               | -0.627776 | 0.555183  |
| 5                | 6                | 0              | -2.422219               | -0.607967 | 0.533900  |
| 6                | 6                | 0              | -3.120828               | 0.266205  | -0.363311 |
| 7                | 6                | 0              | -2.357249               | 1.072450  | -1.178333 |
| 8                | 1                | 0              | -2.863029               | 1.748969  | -1.859705 |
| 9                | 6                | 0              | -0.938337               | 1.064813  | -1.152129 |
| 10               | 1                | 0              | -0.401861               | 1.728977  | -1.821418 |
| 11               | 6                | 0              | -0.208750               | 0.235068  | -0.312741 |
| 12               | 6                | 0              | 1.206123                | 0.225377  | -0.293309 |
| 13               | 6                | 0              | 2.423193                | 0.217360  | -0.276809 |
| 14               | 6                | 0              | 3.843732                | 0.195303  | -0.241910 |
| 15               | 6                | 0              | 4.526693                | -0.656245 | 0.650841  |
| 16               | 6                | 0              | 4.604629                | 1.021052  | -1.094401 |
| 17               | 6                | 0              | 5.914912                | -0.676161 | 0.684736  |
| 18               | 1                | 0              | 3.952369                | -1.303461 | 1.305646  |
| 19               | 6                | 0              | 5.992599                | 0.992984  | -1.051859 |
| 20               | 1                | 0              | 4.093111                | 1.689157  | -1.779880 |
| 21               | 6                | 0              | 6.679789                | 0.145890  | -0.163337 |
| 22               | 1                | 0              | 6.418704                | -1.359372 | 1.361787  |
| 23               | 1                | 0              | 6.556745                | 1.657748  | -1.698962 |
| 24               | 6                | 0              | 8.162335                | 0.120122  | -0.121837 |
| 25               | 6                | 0              | 8.848204                | -0.038165 | 1.095232  |
| 26               | 6                | 0              | 8.920956                | 0.253171  | -1.298047 |
| 27               | 6                | 0              | 10.241326               | -0.062650 | 1.134524  |
| 28               | 1                | 0              | 8.283888                | -0.115251 | 2.019860  |
| 29               | 6                | 0              | 10.314108               | 0.228823  | -1.258692 |
| 30               | 1                | 0              | 8.412698                | 0.348833  | -2.253000 |
| 31               | 6                | 0              | 10.980950               | 0.070786  | -0.042201 |
| 32               | 1                | 0              | 10.750064               | -0.177368 | 2.087545  |
| 33               | 1                | 0              | 10.879563               | 0.324537  | -2.181374 |
| 34               | 1                | 0              | 12.066448               | 0.051739  | -0.011495 |
| 35               | 7                | 0              | -4.542659               | 0.313511  | -0.384666 |
| 36               | 6                | 0              | -5.169916               | 1.513628  | 0.045117  |
| 37               | 6                | 0              | -6.430309               | 1.907856  | -0.439069 |
| 38               | 6                | 0              | -6.950606               | 3.116986  | 0.001727  |

|    |   |   |           |           |           |
|----|---|---|-----------|-----------|-----------|
| 39 | 1 | 0 | -6.979634 | 1.280238  | -1.126850 |
| 40 | 6 | 0 | -4.969310 | 3.429570  | 1.292475  |
| 41 | 6 | 0 | -6.213408 | 3.905512  | 0.890004  |
| 42 | 1 | 0 | -7.922167 | 3.446969  | -0.355162 |
| 43 | 1 | 0 | -4.350625 | 4.005752  | 1.978539  |
| 44 | 1 | 0 | -6.588796 | 4.856102  | 1.253827  |
| 45 | 6 | 0 | -5.260349 | -0.863682 | -0.688515 |
| 46 | 6 | 0 | -4.675282 | -1.853067 | -1.503465 |
| 47 | 6 | 0 | -7.181113 | -2.097159 | -0.463281 |
| 48 | 6 | 0 | -5.399858 | -3.008305 | -1.761137 |
| 49 | 1 | 0 | -3.686817 | -1.708362 | -1.922993 |
| 50 | 6 | 0 | -6.685089 | -3.147931 | -1.230202 |
| 51 | 1 | 0 | -8.181944 | -2.148963 | -0.037434 |
| 52 | 1 | 0 | -4.969521 | -3.788138 | -2.383064 |
| 53 | 1 | 0 | -7.283705 | -4.034097 | -1.411308 |
| 54 | 7 | 0 | -6.493535 | -0.983581 | -0.187489 |
| 55 | 7 | 0 | -4.454816 | 2.261739  | 0.890005  |

-----  
Total Energy (HF) = -1826.5141315 Hartree

## References

1 (a) M. J. Frisch, G. W. Trucks, H. B. Schlegel, G. E. Scuseria, M. A. Robb, J. R. Cheeseman, G. Scalmani, V. Barone, B. Mennucci, G. A. Petersson, H. Nakatsuji, M. Caricato, X. Li, H. P. Hratchian, A. F. Izmaylov, J. Bloino, G. Zheng, J. L. Sonnenberg, M. Hada, M. Ehara, K. Toyota, R. Fukuda, J. Hasegawa, M. Ishida, T. Nakajima, Y. Honda, O. Kitao, H. Nakai, T. Vreven, J. A. Jr. Montgomery, J. E. Peralta, F. Ogliaro, M. Bearpark, J. J. Heyd, E. Brothers, K. N. Kudin, V. N. Staroverov, R. Kobayashi, J. Normand, K. Raghavachari, A. Rendell, J. C. Burant, S. S. Iyengar, J. Tomasi, M. Cossi, N. Rega, N. J. Millam, M. Klene, J. E. Knox, J. B. Cross, V. Bakken, C. Adamo, J. Jaramillo, R. Gomperts, R. E. Stratmann, O. Yazyev, A. J. Austin, R. Cammi, C. Pomelli, J. W. Ochterski, R. L. Martin, K. Morokuma, V. G. Zakrzewski, G. A. Voth, P. Salvador, J. J. Dannenberg, S. Dapprich, A. D. Daniels, O. Farkas, J. B. Foresman, J. V. Ortiz, J. Cioslowski, D. J. Fox, Gaussian 09, revision A.02; Gaussian, Inc.: Wallingford, CT, 2009. (b) Lee, C.; Yang, W.; Parr, R. G. *Phys. Rev. B*, 1988, **37**, 785–789. (c) Becke, A. D. *J. Chem. Phys.*, 1993, **98**, 1372–1377.
